# Supplementary material for: Bayesian Approach to Model CD137 Signaling in Human M. tuberculosis In Vitro Responses
Source: PLoS One. 2013 Feb 20;8(2):e55987. doi: 10.1371/journal.pone.0055987 (PMC3577821; doi:10.1371/journal.pone.0055987)
Supplement: Supporting Information S1 — Equations and table that describe the model and the model parameters. Equations S1–S5, S6–10 and S10–S14 describe the dynamics of APC, NK and T cells respectively. Additional equations are used to relate the system variables with the expected value for each experimental data: the percentage of receptor/ligand expression for the included types of cells, the levels of IFN-γ and TNF-α in the media culture, the percentage of IFN-γ and or TNF-α-secreting cells, the apoptosis for T-cells and the rate of [3H]TdR incorporation by PBMC. Table S1 in Supporting Information S1 include a list of the parameter names, descriptions, units and prior and posterior parameters distribution. Parameters distributions are presented in ranges. (DOCX) [file pone.0055987.s011.docx]

**SUPPORTING INFORMATION**

**Bayesian Approach to Model CD137 Signaling in Human *M. tuberculosis* in vitro Responses**

Darío A. Fernández Do Porto*****, Jerónimo Auzmendi*****, Delfina Peña**†**, Verónica E. García**†**, Luciano Moffatt*****

**ODE equations**

**APC cells dynamics**

Resting (uncommitted) APC (A0)

A0 activation in inflammatory context (macrophages)

A0 activation (inflammatory context independent) (DC)

A0 death

(S1)

TNF- induced apoptosis of APC

Activated APC (Aa)

Aa death

(S2)

Aa CD137 signaling by APC

Aa binding to

blocking anti-CD137 mAb

Aa CD137 signaling by NK

Aa CD137 signaling by TL

CD137:CD137L

induced proliferation of APCa

Activated APC with CD137L signaling(As)

(S3)

CD137:CD137L

induced death of APCa

TNF- induced

apoptosis of APC

As binding to

blocking anti-CD137 mAb (mAb values are constant)

Activated APC with the receptor bound to blocking anti-CD137 mAb (AAb)

TNF- induced apoptosis of APC

AAb death

(S4)

AAb CD137 signaling by APC

AAb CD137 signaling by NK

AAb CD137 signaling by TL

Activated APC, signalized by CD137::CD137L and with the receptor bound to blocking anti-CD137 mAb (As_Ab)

(S5)

TNF- induced

apoptosis of APC

CD137:CD137L

induced death of APCa

CD137:CD137L

induced proliferation of APCa

**NK cells dynamics**

Resting (uncommitted) NK (N0)

NK0 proliferation

NK0 death

N0 activation induced by the antigen, APC and IL-12

(S6)

Activated NK (Na)

Na proliferation

(S7)

Na CD137L signaling by NK

Na CD137L signaling by APC

Na binding to

blocking anti-CD137 mAb (mAb values are constant)

NK0 death

TNF- induced

apoptosis of APC

Activated NK with CD137L signaling (Ns)

NKs proliferation

(S8)

Ns death

Ns binding to blocking anti-CD137 mAb

TNF- induced

apoptosis of APC

Activated NK with the receptor bound to blocking anti-CD137 mAb (NAb)

TNF- induced

apoptosis of APC

NKAb death

NKAb proliferation

(S9)

Activated NK, signalized by CD137::CD137L and with the receptor bound to blocking anti-CD137 mAb (Ns_Ab)

TNF- induced

apoptosis of APC

NKs_Ab proliferation

NKs_Ab death

(S10)

**TL cells dynamics**

Non-antigen-specific T cells (Tns)

Tns death

Tns proliferation

(S11)

Naïve specific T cells (T0)

T differentiation (induced by activated APC)

T0 proliferation

T0 death

(S12)

TNF- induced

apoptosis of APC

T cells activated by APC (with CD137:CD137L signaling) (Ts)

Ts death

(S13)

Ts proliferation

T differentiation (induced by activated APC)

T cells activated by APC (without CD137:CD137L signaling) (Tbl)

TNF- induced

apoptosis of T cells

Effect of CD137 blockade in Ts death

(S14)

Effect of CD137 blockade in Ts proliferation

T differentiation (induced by activated APC) with CD137::CD137L interaction blocked

**Media dynamics.**

*IFN- levels*

(S15)´´´

(S15)

(S15)´

(S15)´´

*TNF- levels*

(S16)´´´

(S16)

(S16)´´

(S16)´

Antigen concentration

(Media treatment)

(*M.tb* treatment and blocking treatment)

(S17)

**Other APC equations**

Total number of APC

(R1)

Percentage of APC producing IFN- and TNF-

(R2)

(R3)

Percentage of APC expressing receptor and ligand

(R4)

**Other NK equations**

Total number of NK

(R5)

Percentage of NK producing IFN- and TNF-

(R6)

(R7)

Percentage of NK expressing receptor and ligand

(R8)

**Other TL equations**

Total number of TL

(R9)

Percentage of TL producing IFN- and TNF-

(R11)

(R12)

Percentage of TL expressing receptor

(R10)

Percentage of TL undergoing apoptosis/necrosis

(R13)

**Other Media equations.**

Total number of cells

(R14)

Proliferation ratio

(R15)

### [tritiated thymidine](http://www.google.com.ar/url?sa=t&rct=j&q=triate+thymidine&source=web&cd=1&ved=0CCEQFjAA&url=http%3A%2F%2Flinkinghub.elsevier.com%2Fretrieve%2Fpii%2F0027510769901146&ei=L0NFT4quL8KyiQL368m5Dg&usg=AFQjCNEmIeh8UrHSZP4nXVdW_d-oCzaI7Q&sig2=WPa8Q2RI2uaxH3ydcEOQFQ)incorporation

(R16)

Time dependent variables are written in *italics*, parameters are written in normal type

Table S1. List of parameter names, descriptions, units and prior and posterior parameters distribution. Parameters distributions are presented in ranges.

| **Name** | **Reference** | **units** | **Description** |
| --- | --- | --- | --- |
| **rA** | [[1](#_ENREF_1)] | ------ | Ratio of APC in PBMC |
| **rN** | [[2](#_ENREF_2)] | ------ | Ratio of NKbright in PBMC |
| **rT** | [[2](#_ENREF_2)] | ------ | Ratio of TL PBMC |
| **rTsp** | [[3](#_ENREF_3)] [[4](#_ENREF_4)] | ------ | Ratio of TLspecific to M.tb |
| **A0** | Estimated | ng A0-1 h-1 | IFN production by A0 |
| **Aa** | Estimated | ng Aa-1 h-1 | IFN production by Aa |
| **IA** | [[5](#_ENREF_5),[6](#_ENREF_6)] | ------ | Induction factor of IFN production by CD137::CD137L of APC |
| **A0** | [[7](#_ENREF_7)] | ng Aa-1 h-1 | TNFproduction by A0 |
| **Aa** | [[7](#_ENREF_7)] | ng Aa-1 h-1 | TNF production by Aa |
| **IA** | [[5](#_ENREF_5),[6](#_ENREF_6)] | ------ | Induction of TNFproduction by CD137::CD137L of APC |
| **μA0** | [[7](#_ENREF_7)] | h-1 | Death rate for A0 |
| **μAa** | [[7](#_ENREF_7)] | h-1 | Death rate for Aa |
| **μIA** | [[8](#_ENREF_8)] [[9](#_ENREF_9)] | ------ | Induction of death by CD137::CD137L of APC |
| **μαA** | [[10](#_ENREF_10)] | h-1 | Maximum rate of TNF- dependent apoptosis of APC |
| **KαμA** | [[7](#_ENREF_7)] | ng | Half-sat for TNF-dependent apoptosis of APC |
| **A** | [[9](#_ENREF_9),[11](#_ENREF_11)] | h-1 | Proliferation rate of As |
| **rA0** | Estimated | ------ | A0IFN+/A0 ratio |
| **rAa** | Estimated | ------ | AaIFN+/Aa ratio |
| **rA0** | Estimated | ------ | AaTNF+/Aa ratio |
| **rRLA0** | Estimated | ------ | A0 CD137+ CD137L+ / A0 ratio |
| **k(AxA)** | [[7](#_ENREF_7)] | cell-1 h-1 | APC-APC interaction rate |
| **k(AxN)** | Estimated | cell-1 h-1 | APC-NK interaction rate |
| **k(AxT)** | [[7](#_ENREF_7)] | cell-1 h-1 | APC-LT interaction rate |
| **k(AxAg)** | [[7](#_ENREF_7)] | μg-1 h-1 | APC activation rate |
| **k(AxAg)** | [[7](#_ENREF_7)] | μg-1 h-1 | APC-APC interaction rate (inflammatory context) |
| **k(AxAb)** | Estimated | μg-1 h-1 | Ab binding rate for APC |
| **KA0,Aa)** | Estimated | μg-1 | Half-sat of IFN- on APC activation |
| **K(A0,Aa)** | Estimated | μg-1 | Half-sat of TNF- on APC activation |
| **N0** | [[10](#_ENREF_10)] | ng-1 h-1 | IFN production by N0 |
| **Na** | [[10](#_ENREF_10)] | ng-1 h-1 | IFN production by Na |
| **IN** | [[12](#_ENREF_12)] |  | Induction of IFN production by CD137 of NK |
| **N0** | Estimated | μg-1 h-1 | TNF production by N0 |
| **Na** | [[13](#_ENREF_13)] | μg-1 h-1 | TNF production by Na |
| **IN** | Estimated | ------ | Induction of TNF production by CD137 of NK |
| **μN0** | [[14](#_ENREF_14)] | h-1 | Death rate for N0 |
| **μNa** | [[14](#_ENREF_14)] | h-1 | Death rate for Na |
| **μαN** | Estimated | h-1 | Maximum rate of TNF- dependent apoptosis of NK |
| **KμN** | Estimated | ng | TNF half-sat for TNF- dependent apoptosis of NK |
| **N0** | [[14](#_ENREF_14)] | h-1 | N0 Maximum proliferation rate |
| **Na** | [[14](#_ENREF_14)] | h-1 | Na Maximum proliferation rate |
| **rN0** | [[15](#_ENREF_15)] | ------ | Na IFN-+/Na ratio |
| **rN0** | [[16](#_ENREF_16)] | ------ | N0 TNF-+/N0 ratio |
| **rNa** | Estimated | ------ | Na TNF-+/Na ratio |
| **rRLN0** | [[12](#_ENREF_12)] | ------ | N0 CD137+ CD137L+/N0 ratio |
| **rRLNa** | [[12](#_ENREF_12)] | ------ | Na CD137+ CD137L+/Na ratio |
| **k(NxN)** | Estimated | cell-1 h-1 | NK-NK interaction rate |
| **k(NxAb)** | Estimated | μg-1 h-1 | Ab binding rate for NK |
| **k(N0,Na)A** | Estimated | μg-1 cell-1 | Maximum NK activation rate, dependent on APC and indirect IL-12 |
| **KA(N0,Na)** | Estimated | μgcell | APC half-sat on enhancement of NK activation |
| **K(N0,Na)** | Estimated | ng | Half-sat of IFN- on NK activation |
| **K(N0,Na)** | Estimated | ng | Half-sat of TNF- on NK activation |
| **T0** | [[17](#_ENREF_17)] | ng-1 h-1 | IFN-production rate by LT0 |
| **Ts** | [[10](#_ENREF_10)] | ng-1 h-1 | IFN-production rate by LTs |
| **IT** | [[18](#_ENREF_18)] [[19](#_ENREF_19)] | ------ | Induction of IFN-production by CD137 |
| **T0** | Estimated | ng-1 h-1 | TNF-production rate by T0 |
| **Ts** | [[10](#_ENREF_10)] [[20](#_ENREF_20)] [[21](#_ENREF_21)] | ng-1 h-1 | TNF-production rate by Ts |
| **IT** | [[19](#_ENREF_19)] | ------ | Induction of TNF-production by CD137 |
| **μT0** | [[14](#_ENREF_14)] [[7](#_ENREF_7)] | h-1 | Apoptosis rate of T0 |
| **μTs** | [[7](#_ENREF_7)] | h-1 | Apoptosis rate of Ts |
| **μIT** | [[22](#_ENREF_22)] | ------ | Induction of apoptosis rate by CD137 |
| **μαT** | [[7](#_ENREF_7)] | h-1 | Maximum rate of TNF-dependent apoptosis of TL |
| **KT** | [[7](#_ENREF_7)] | ng | TNF half-sat for TNF-dependent apoptosis of TL |
| **T0** | [[14](#_ENREF_14)] | h-1 | Proliferation rate of T0 |
| **Ts** | [[7](#_ENREF_7)] | h-1 | Proliferation rate of Ts |
| **IT** | [[22](#_ENREF_22)] | ------ | Induction of proliferation rate by CD137 |
| **rT0** | [[23](#_ENREF_23)] | ------ | T0 IFN-+/T0 ratio |
| **rTs** | UD* | ------ | Ts IFN-+/Ts ratio |
| **rT0** | Estimated | ------ | T0 TNF-+/T0 ratio |
| **rTs** | UD* | ------ | Ts TNF-+/Ts ratio |
| **rRT0** | [[22](#_ENREF_22)] | ------ | T0CD137+/T0 ratio |
| **K(TxAb)** | Estimated | μg-1 h-1 | TL-mAb binding rate |
| **Ap** | [[24](#_ENREF_24)] | h | Duration of Apoptosis |
| **μ** |  | h-1 | Degradation rate of TNF- |
| **μ** | [[25](#_ENREF_25)] [[26](#_ENREF_26)] | h-1 | Degradation rate of IFN- |
| **μAg** |  | h-1 | Degradation/internalization rate of Ag |
| ****Tym** | Estimated | cpm cell-1 | Scaling factor [H3]timidine-proliferation |
| **mCells** | Estimated | cell | Maximum number of cell supported by the media |

*UD=Unpublished data

References

1. Sleasman JW, Leon BH, Aleixo LF, Rojas M, Goodenow MM (1997) Immunomagnetic selection of purified monocyte and lymphocyte populations from peripheral blood mononuclear cells following cryopreservation. Clin Diagn Lab Immunol 4: 653-658.

2. Sotosek S, Sotosek Tokmadzic V, Mrakovcic-Sutic I, Tomas MI, Dominovic M, et al. (2011) Comparative study of frequency of different lymphocytes subpopulation in peripheral blood of patients with prostate cancer and benign prostatic hyperplasia. Wien Klin Wochenschr 123: 718-725.

3. Kaufmann SH, Vath U, Thole JE, Van Embden JD, Emmrich F (1987) Enumeration of T cells reactive with Mycobacterium tuberculosis organisms and specific for the recombinant mycobacterial 64-kDa protein. Eur J Immunol 17: 351-357.

4. Modlin RL, Melancon-Kaplan J, Young SM, Pirmez C, Kino H, et al. (1988) Learning from lesions: patterns of tissue inflammation in leprosy. Proc Natl Acad Sci U S A 85: 1213-1217.

5. Nguyen QT, Ju SA, Park SM, Lee SC, Yagita H, et al. (2009) Blockade of CD137 signaling counteracts polymicrobial sepsis induced by cecal ligation and puncture. Infect Immun.

6. Lee SC, Ju SA, Sung BH, Heo SK, Cho HR, et al. (2009) Stimulation of the molecule 4-1BB enhances host defense against Listeria monocytogenes infection in mice by inducing rapid infiltration and activation of neutrophils and monocytes. Infect Immun 77: 2168-2176.

7. Marino S, Myers A, Flynn JL, Kirschner DE (2010) TNF and IL-10 are major factors in modulation of the phagocytic cell environment in lung and lymph node in tuberculosis: a next-generation two-compartmental model. J Theor Biol 265: 586-598.

8. Langstein J, Becke FM, Sollner L, Krause G, Brockhoff G, et al. (2000) Comparative analysis of CD137 and LPS effects on monocyte activation, survival, and proliferation. Biochem Biophys Res Commun 273: 117-122.

9. Langstein J, Michel J, Schwarz H (1999) CD137 induces proliferation and endomitosis in monocytes. Blood 94: 3161-3168.

10. Sud D, Bigbee C, Flynn JL, Kirschner DE (2006) Contribution of CD8+ T cells to control of Mycobacterium tuberculosis infection. J Immunol 176: 4296-4314.

11. Langstein J, Schwarz H (1999) Identification of CD137 as a potent monocyte survival factor. J Leukoc Biol 65: 829-833.

12. Baessler T, Charton JE, Schmiedel BJ, Grunebach F, Krusch M, et al. (2010) CD137 ligand mediates opposite effects in human and mouse NK cells and impairs NK-cell reactivity against human acute myeloid leukemia cells. Blood 115: 3058-3069.

13. Millman AC, Salman M, Dayaram YK, Connell ND, Venketaraman V (2008) Natural killer cells, glutathione, cytokines, and innate immunity against Mycobacterium tuberculosis. J Interferon Cytokine Res 28: 153-165.

14. Lutz CT, Karapetyan A, Al-Attar A, Shelton BJ, Holt KJ, et al. (2011) Human NK cells proliferate and die in vivo more rapidly than T cells in healthy young and elderly adults. J Immunol 186: 4590-4598.

15. Alvarez IB, Pasquinelli V, Jurado JO, Abbate E, Musella RM, et al. (2010) Role played by the programmed death-1-programmed death ligand pathway during innate immunity against Mycobacterium tuberculosis. J Infect Dis 202: 524-532.

16. Ramana Rao PV, Rajasekaran S, Raja A (2010) Natural Killer Cell–Mediated Cytokine Response Among HIV-Positive South Indians With Pulmonary Tuberculosis. J Interferon Cytokine Res 30(1): 33-42.

17. Wigginton JE, Kirschner D (2001) A model to predict cell-mediated immune regulatory mechanisms during human infection with Mycobacterium tuberculosis. J Immunol 166: 1951-1967.

18. Shuford WW, Klussman K, Tritchler DD, Loo DT, Chalupny J, et al. (1997) 4-1BB costimulatory signals preferentially induce CD8+ T cell proliferation and lead to the amplification in vivo of cytotoxic T cell responses. J Exp Med 186: 47-55.

19. Zhang B, Maris CH, Foell J, Whitmire J, Niu L, et al. (2007) Immune suppression or enhancement by CD137 T cell costimulation during acute viral infection is time dependent. J Clin Invest 117: 3029-3041.

20. Rojas M, Olivier M, Gros P, Barrera LF, Garcia LF (1999) TNF-alpha and IL-10 modulate the induction of apoptosis by virulent Mycobacterium tuberculosis in murine macrophages. J Immunol 162: 6122-6131.

21. Li L, Sad S, Kagi D, Mosmann TR (1997) CD8Tc1 and Tc2 cells secrete distinct cytokine patterns in vitro and in vivo but induce similar inflammatory reactions. J Immunol 158: 4152-4161.

22. Wang C, Lin GH, McPherson AJ, Watts TH (2009) Immune regulation by 4-1BB and 4-1BBL: complexities and challenges. Immunol Rev 229: 192-215.

23. Jurado JO, Alvarez IB, Pasquinelli V, Martinez GJ, Quiroga MF, et al. (2008) Programmed death (PD)-1:PD-ligand 1/PD-ligand 2 pathway inhibits T cell effector functions during human tuberculosis. J Immunol 181: 116-125.

24. Potten C. S. , W. WJ (2004) Apoptosis: the life and death of cells: Cambridge University Prees.

25. Lortat-Jacob H, Baltzer F, Grimaud JA (1996) Heparin decreases the blood clearance of interferon-gamma and increases its activity by limiting the processing of its carboxyl-terminal sequence. J Biol Chem 271: 16139-16143.

26. Miyakawa N, Nishikawa M, Takahashi Y, Ando M, Misaka M, et al. (2011) Prolonged circulation half-life of interferon gamma activity by gene delivery of interferon gamma-serum albumin fusion protein in mice. J Pharm Sci 100: 2350-2357.
